# Supplementary material for: Hybrid-metal hydroxyl fluoride nanosheet arrays as a bifunctional electrocatalyst for efficient overall water splitting
Source: Royal Society of Chemistry journal article supplement (doi:10.1039/d2ta00502f), 2022-01-01
Supplement: d2ta00502f1.pdf [file d2ta00502f1.pdf]

## Electronic Supplementary Information

### Hybrid-metal hydroxyl fluoride nanosheet arrays as a bifunctional electrocatalyst for efficient overall water splitting

Yafei Li <sup>a,b</sup>, Xingwu Zhai <sup>a,c</sup>, Changchun Fan <sup>a</sup>, Xunxin Chen <sup>a</sup>, Yinglun Liu <sup>a,b</sup>, Jueming Yang <sup>b</sup>, Long Chen <sup>\*,a</sup>, Guixian Ge <sup>\*,b</sup> and Jinli Zhang <sup>\*,a,d</sup>

<sup>a</sup> Key Laboratory for Green Processing of Chemical Engineering of Xinjiang Bingtuan, School of Chemistry and Chemical Engineering, Shihezi University, Shihezi, 832003, PR China

<sup>b</sup> Key Laboratory of Ecophysics and Department of Physics, College of Science, Shihezi University, Shihezi, 832003, PR China

<sup>c</sup> Hefei National Laboratory for Physical Sciences at the Microscale, School of Chemistry and Materials Science, University of Science and Technology of China, Hefei, 230026, PR China.

<sup>d</sup> School of Chemical Engineering and Technology, Tianjin University, Tianjin, 300072, PR China

\*Corresponding author: [chenlong2012@sinano.ac.cn](mailto:chenlong2012@sinano.ac.cn), [geguixian@126.com](mailto:geguixian@126.com) and [zhangjinli@tju.edu.cn](mailto:zhangjinli@tju.edu.cn)

## Electrochemical measurements.

Tafel slopes were calculated from the polarization curves using the Tafel equation

$$\eta = a + b \times \log[j] \quad (1)$$

where  $\eta$  is the overpotential,  $j$  is the current density, and  $b$  is the objective Tafel slope.

The value of turnover frequency (TOF) is obtained as follows

$$\text{TOF} = \text{mol (O}_2\text{) s}^{-1} / (\text{mol active sites}) = \text{current} \times A / (4F \times \text{mol active sites}) \quad (2)$$

$$\text{TOF} = \text{mol (H}_2\text{) s}^{-1} / (\text{mol active sites}) = \text{current} \times A / (2F \times \text{mol active sites}) \quad (3)$$

where current is the current density ( $\text{mA cm}^{-2}$ ) at different overpotentials,  $A$  represents the surface area of as-prepared electrode, the number 4 (or 2) means a four- (or two-) electron reaction for OER and HER, respectively.  $F$  is the Faraday's constant ( $96485.3 \text{ C mol}^{-1}$ ), and the active sites is the number of moles of the active components that are deposited on the substrate of nickel foam.

## Experimental Methods.

### Materials.

Iron (III) nitrate nonahydrate (98.5%, AR) was purchased from Macklin Biochemical Co., Ltd (Shanghai), Cobalt (II) nitrate hexahydrate (99.0%, AR) and urea (99.0%, AR) were provided by Aladdin Biochemical Technology Development Co., Ltd (Shanghai), ammonium fluoride (98.0%, AR) was bought from Tianjin Chemical Co., Ltd, nickel foam (1.5 mm in thickness) was purchased from Lizhiyuan Intelligent

Technology Co., Ltd (Taiyuan), All chemicals were used without any purification.

Ultrapure water (18.25 MX cm) was used throughout.

**Pretreated nickel foam.**

Nickel foam (NF) ultrasonically for 30 minutes in acetone solution, 1M HCl solution, alcohol and ultrapure water, successively. The pretreated NF was dried in vacuum at 80°C for the whole night.

**Supplementary Notes.**

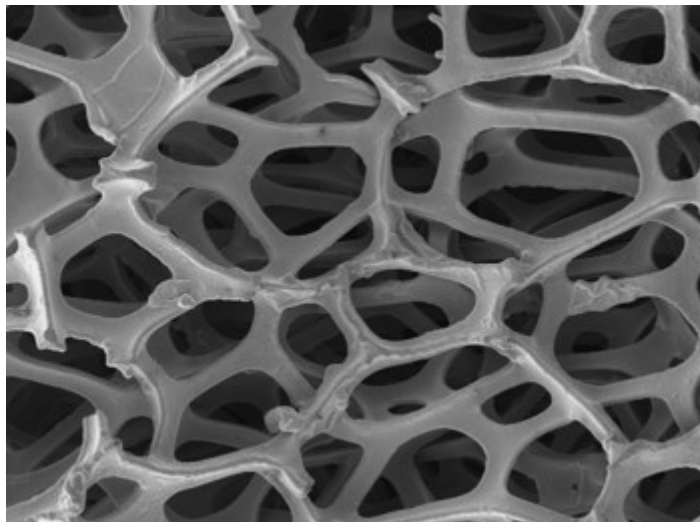

**Figure S1.** SEM patten of NF.

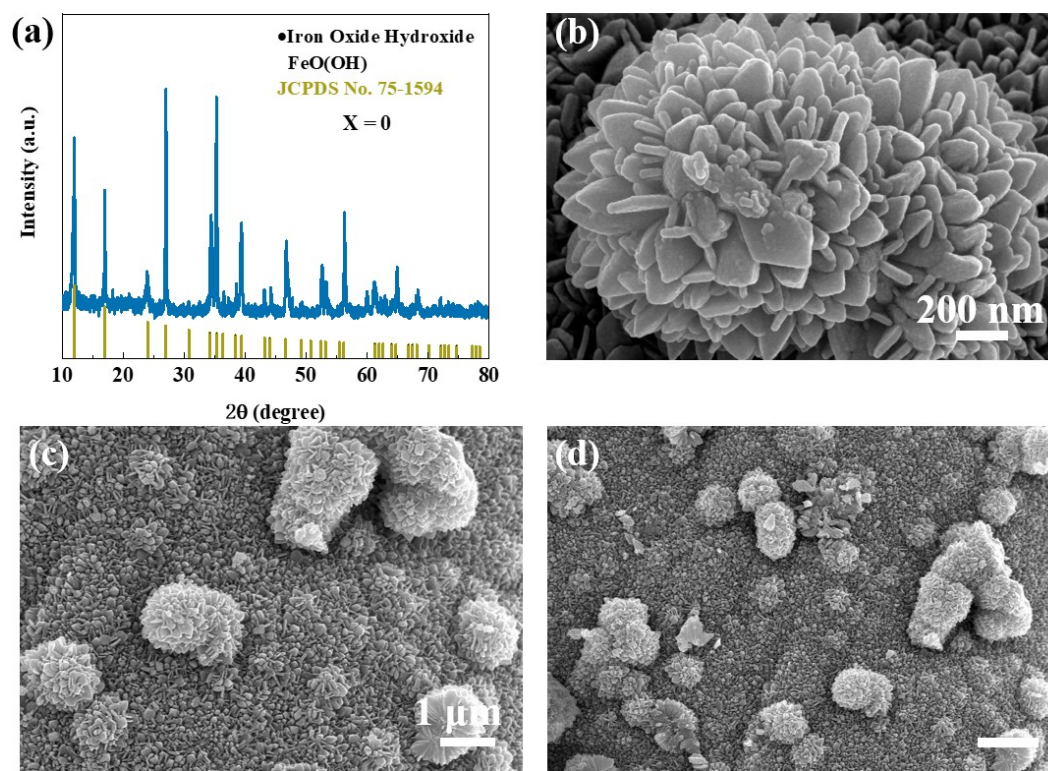

**Figure S2.** (a) XRD pattern and (b-d) SEM images of FeO(OH).

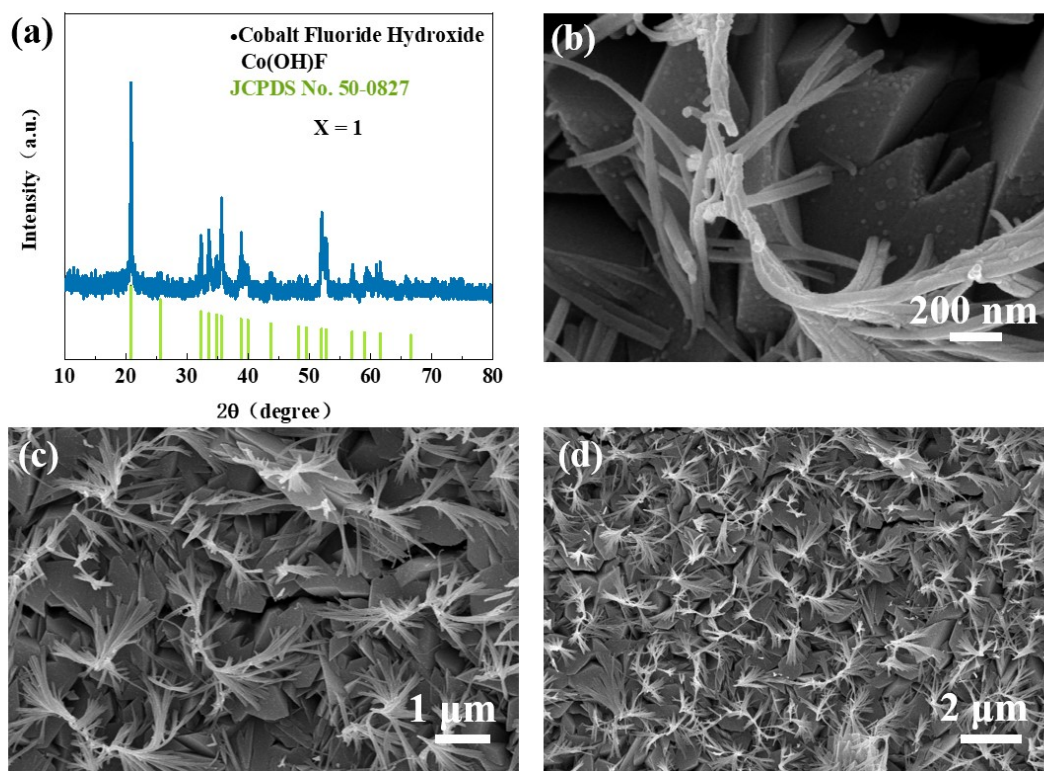

**Figure S3.** (a) XRD pattern and (b-d) SEM images of  $\text{Co(OH)F}$ .

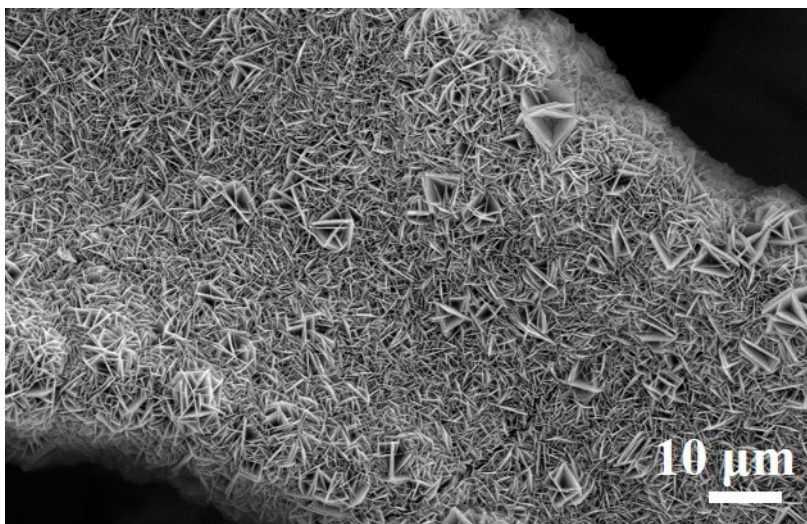

**Figure S4.** SEM patten of  $\text{Co}_{0.21}\text{Fe}_{0.28}(\text{OH})\text{F}$ .

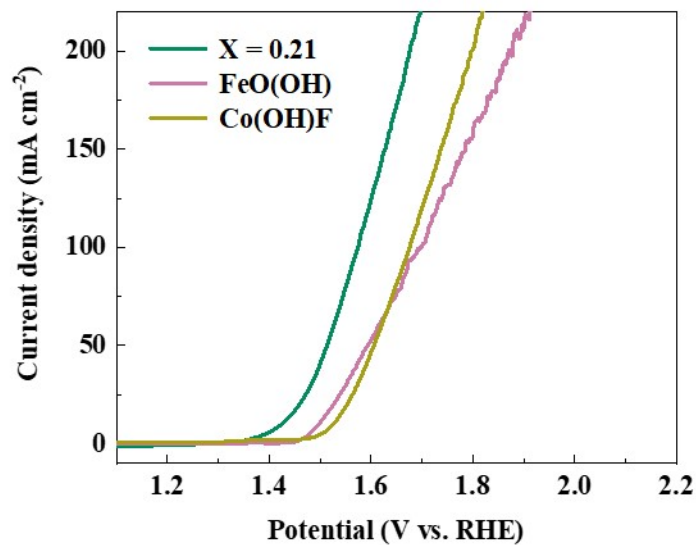

**Figure S5.** OER LSV curves of  $\text{Co}_x\text{Fe}_y(\text{OH})\text{F}$ ,  $\text{FeO}(\text{OH})$ , and  $\text{Co}(\text{OH})\text{F}$  electrocatalysts 1 M KOH electrolyte.

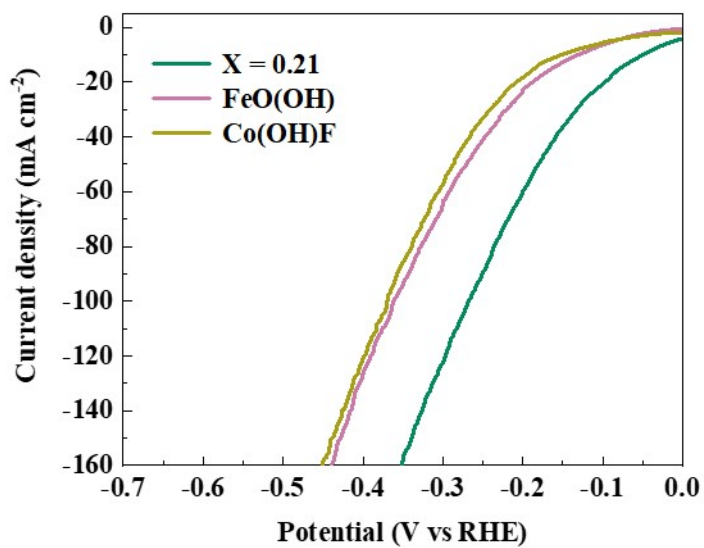

**Figure S6.** HER LSV curves of  $\text{Co}_x\text{Fe}_y(\text{OH})\text{F}$ ,  $\text{FeO}(\text{OH})$ , and  $\text{Co}(\text{OH})\text{F}$  electrocatalysts 1 M KOH electrolyte.



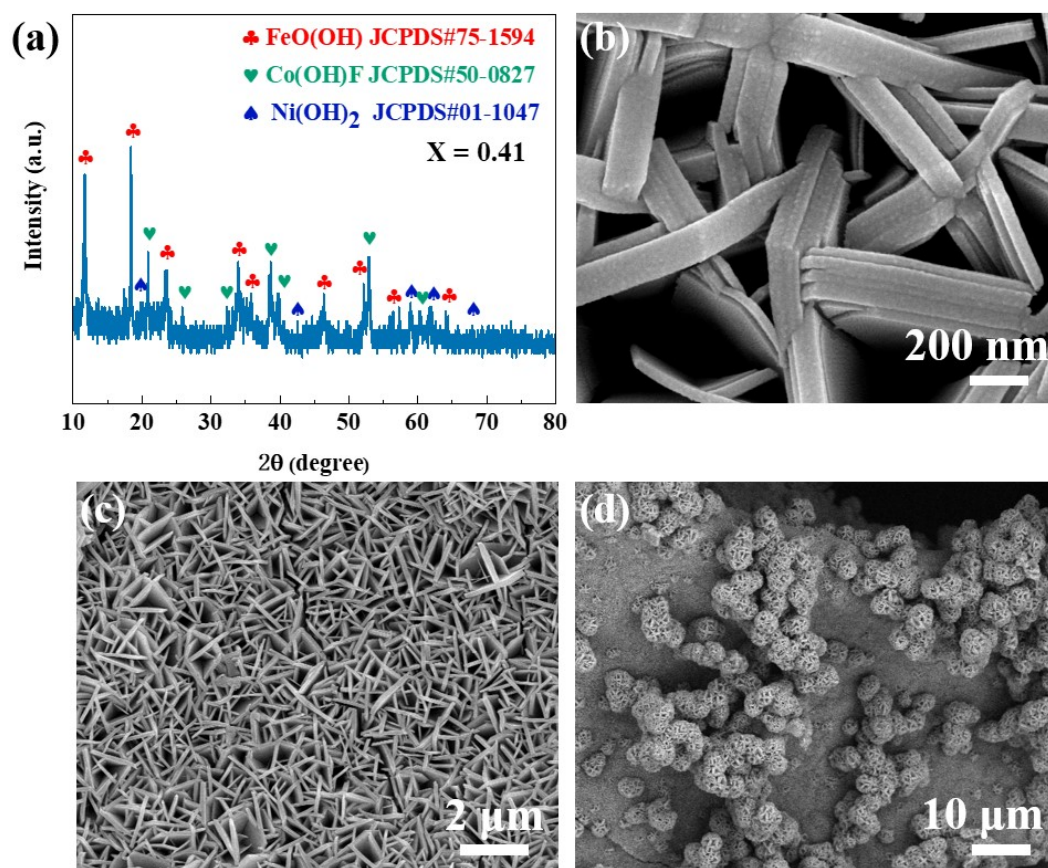

**Figure S7.** (a) XRD pattern and (b-d) SEM images of  $x = 0.41$ .

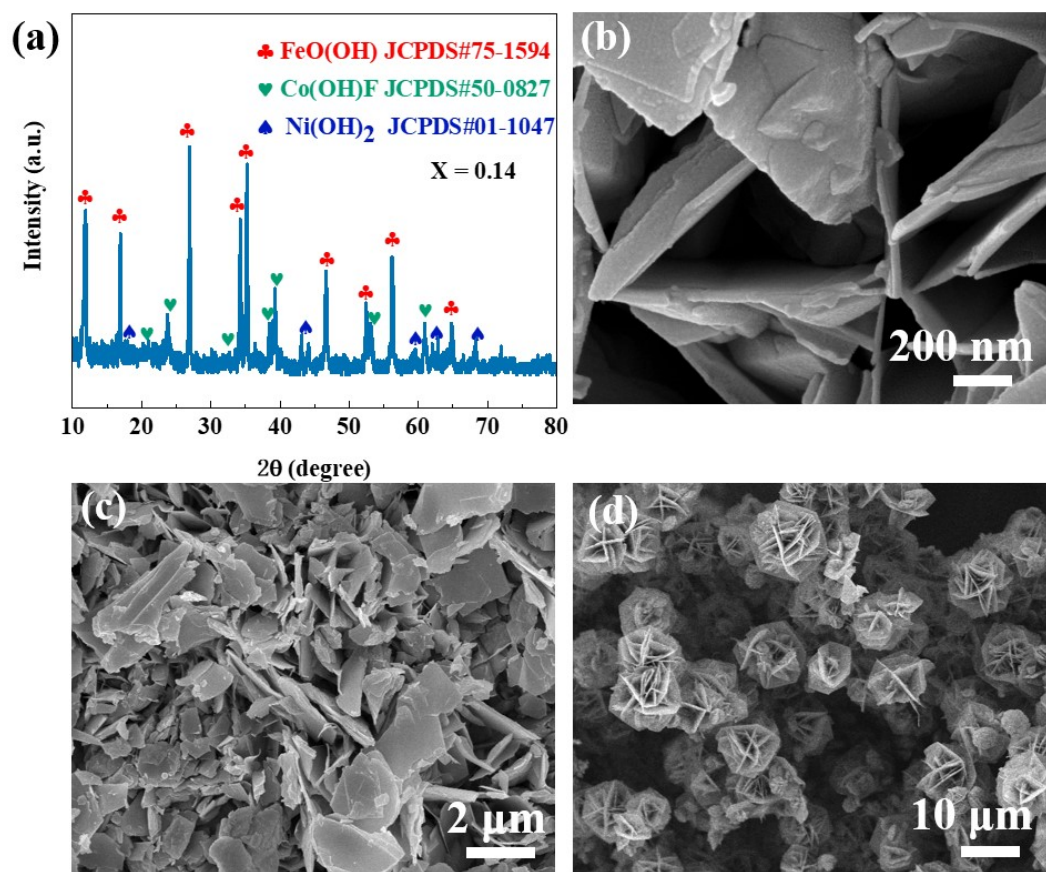

**Figure S8.** (a) XRD pattern and (b-d) SEM images of  $x = 0.14$ .

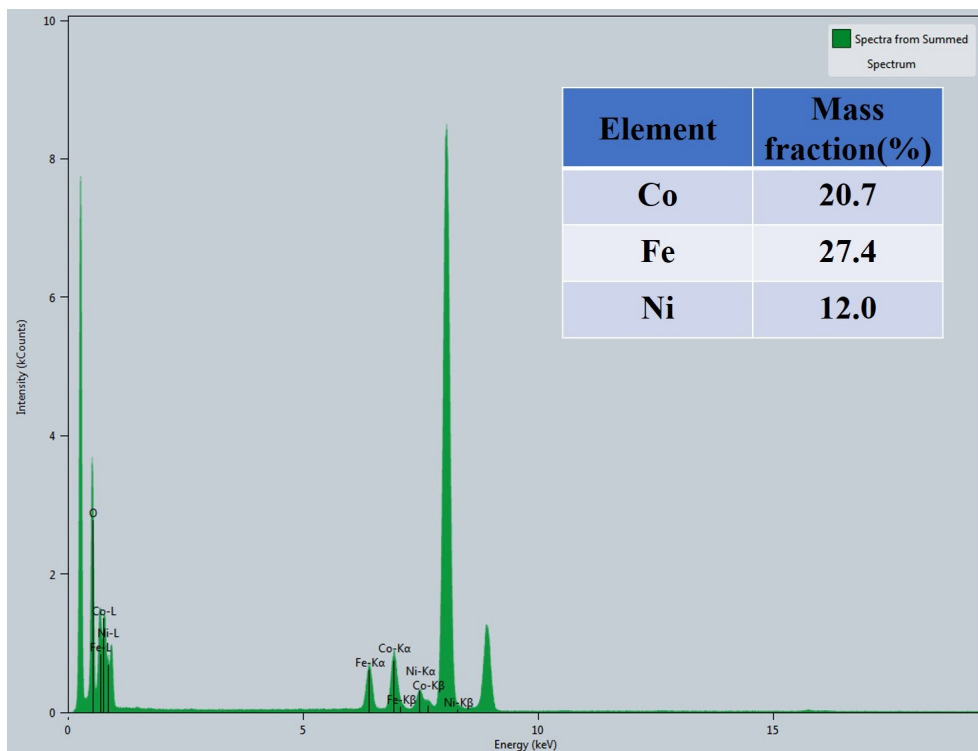

**Figure S9.** EDS patten of  $x = 0.21$ .

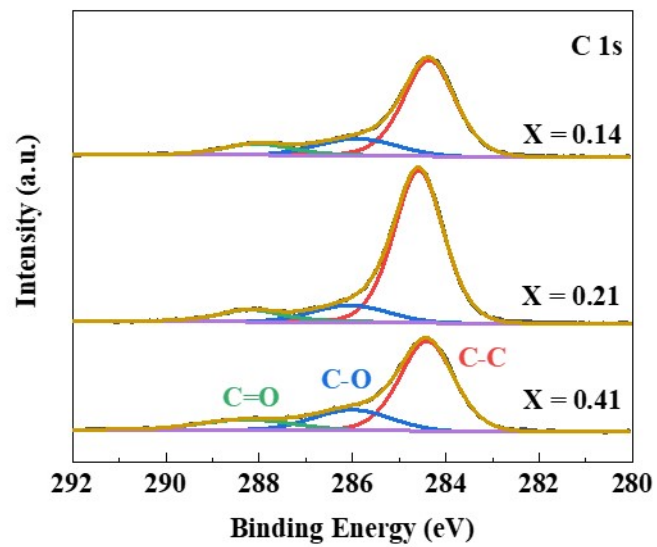

**Figure S10.** High-resolution XPS spectra of C in  $x = 0.41$ ,  $0.21$ , and  $0.14$ .

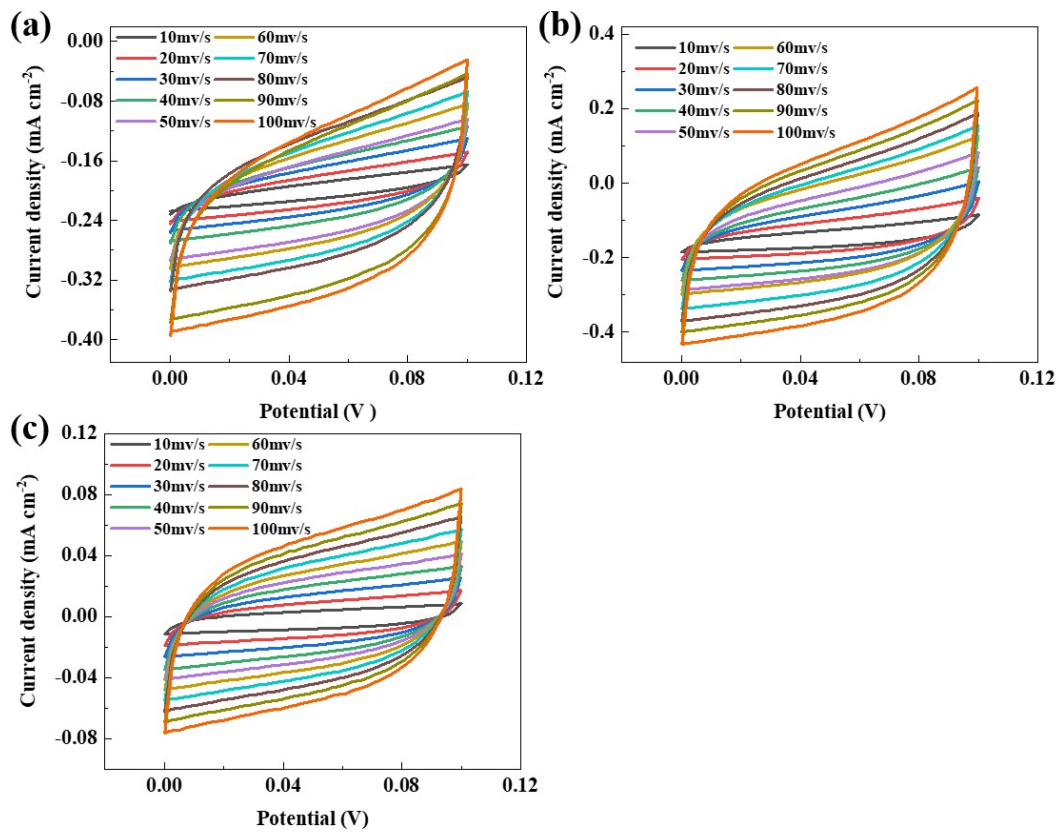

**Figure S11.** CV curves of  $\text{Co}_x\text{Fe}_y(\text{OH})\text{F}$  (a)  $x = 0.41$ , (b)  $x = 0.21$  and (c)  $x = 0.14$  electrocatalysts at different scan rates of 10, 20, 30, 40, 50, 60, 70, 80, 90 and 100  $\text{mV s}^{-1}$  in a non-faradaic region.

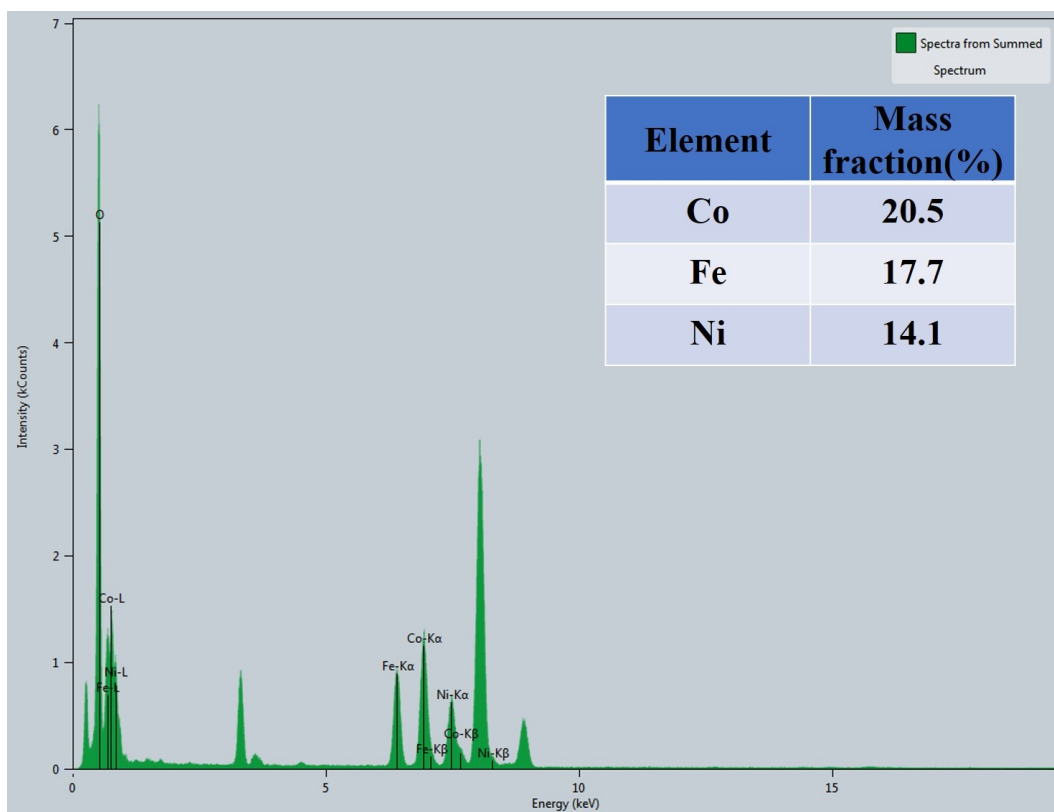

**Figure S12.** EDS patten of  $x = 0.21$  after 10h OER reaction.

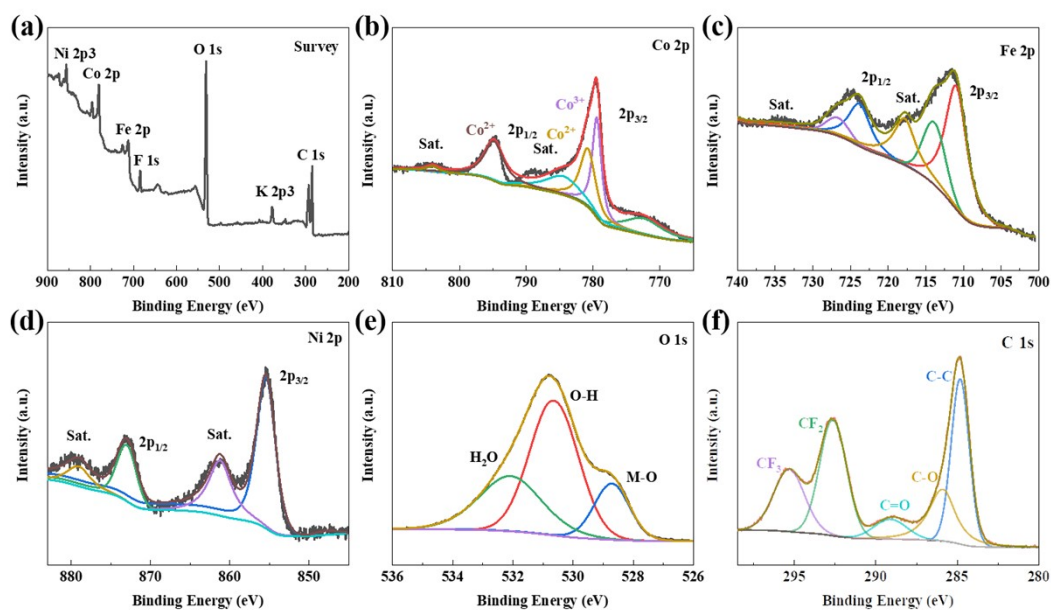

**Figure S13.** (a) the survey XPS spectra of  $x = 0.21$  after 10h OER reaction. High-resolution XPS spectra of (b) Co, (c) Fe, (d) Ni, (e) O, and (f) C in  $x = 0.21$  after 10h OER reaction.

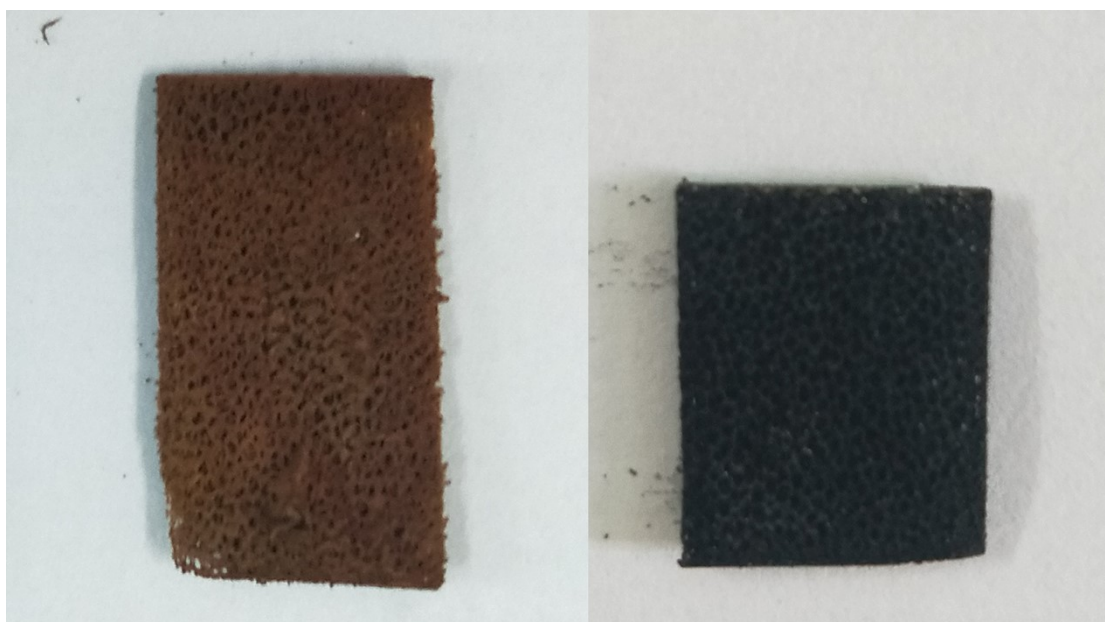

**Initial**

**After 120h**

**Figure S14.** Digital photograph of  $x = 0.21$ .



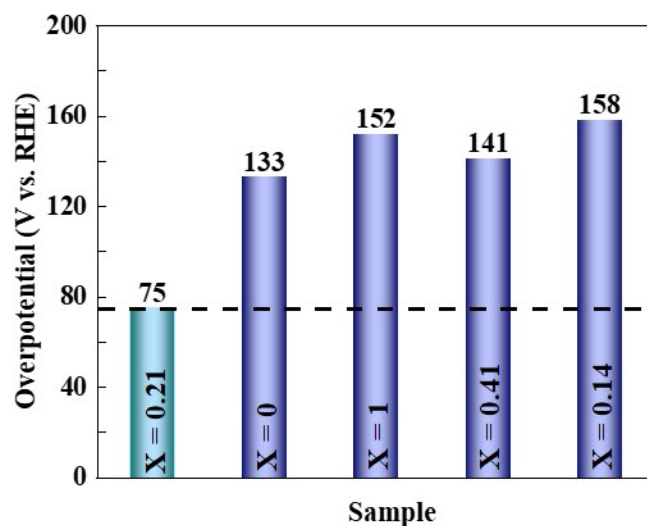

**Figure S15.** Overpotential derived from the LSV curves the  $x = 1, 0.41, 0.21, 0.14$  and  $0$  electrocatalysts.

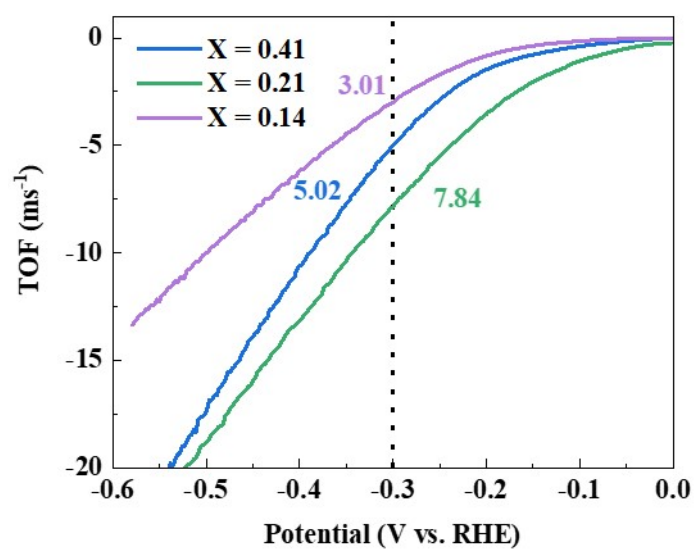

**Figure S16.** TOF values of the  $x = 0.41, 0.21,$  and  $0.14$  electrocatalysts.

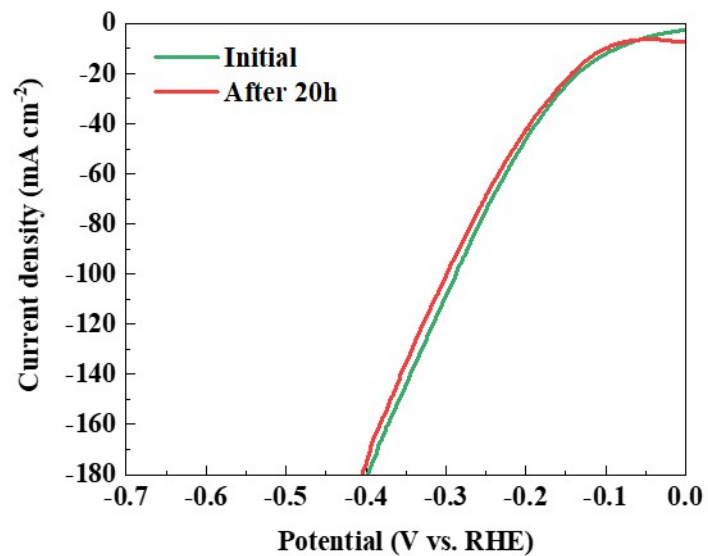

**Figure S17.** HER LSV of  $x = 0.21$  in 1 M KOH electrolyte before and after running stability measurement.

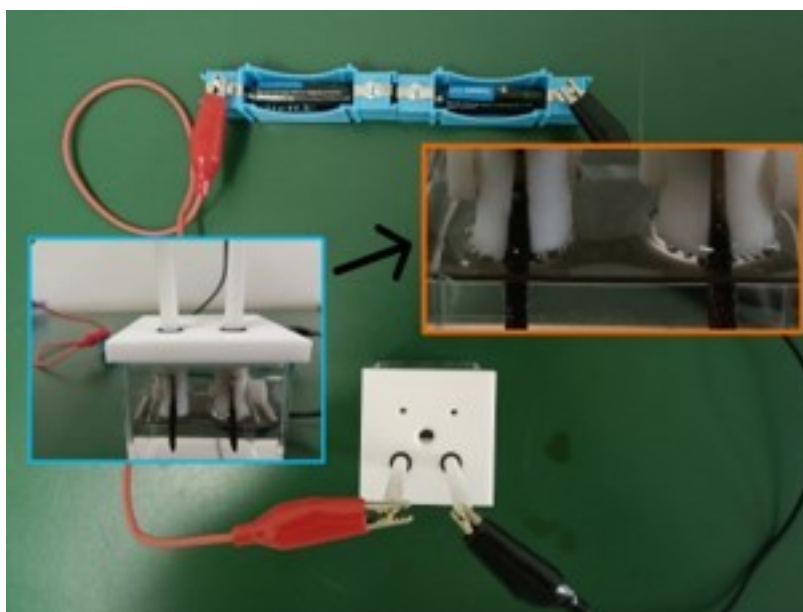

**Figure S18.** Digital photograph of the  $x = 0.21||x = 0.21$  cell for driven by two dry batteries.

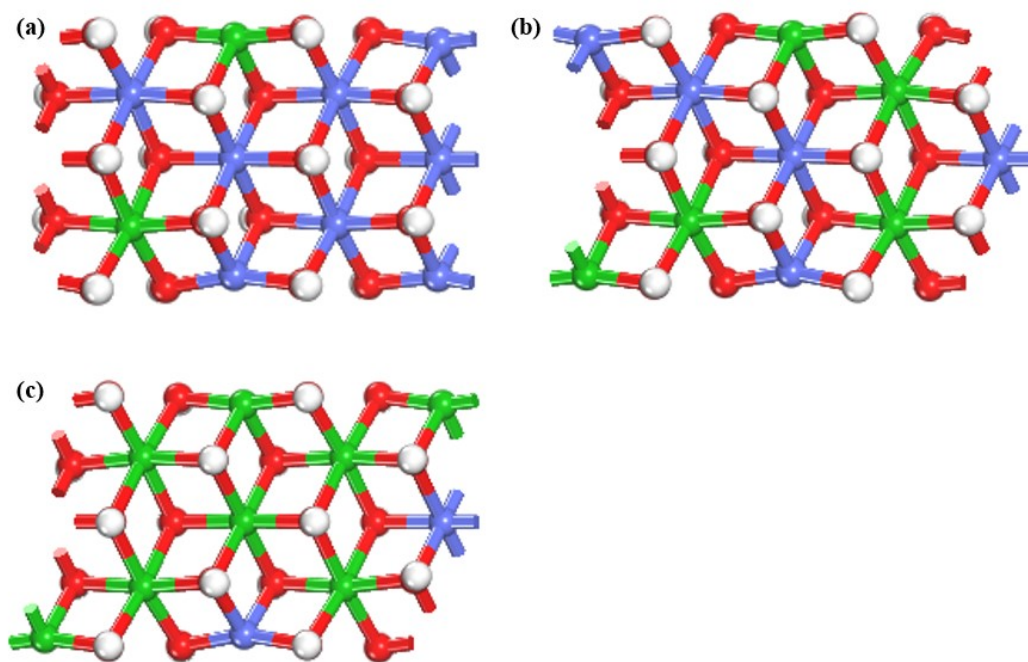

**Figure S19.** The physical model of CoFe hydroxide with different value of Co/Fe (a) 4:1, (b) 1:1, and (c) 1:4.

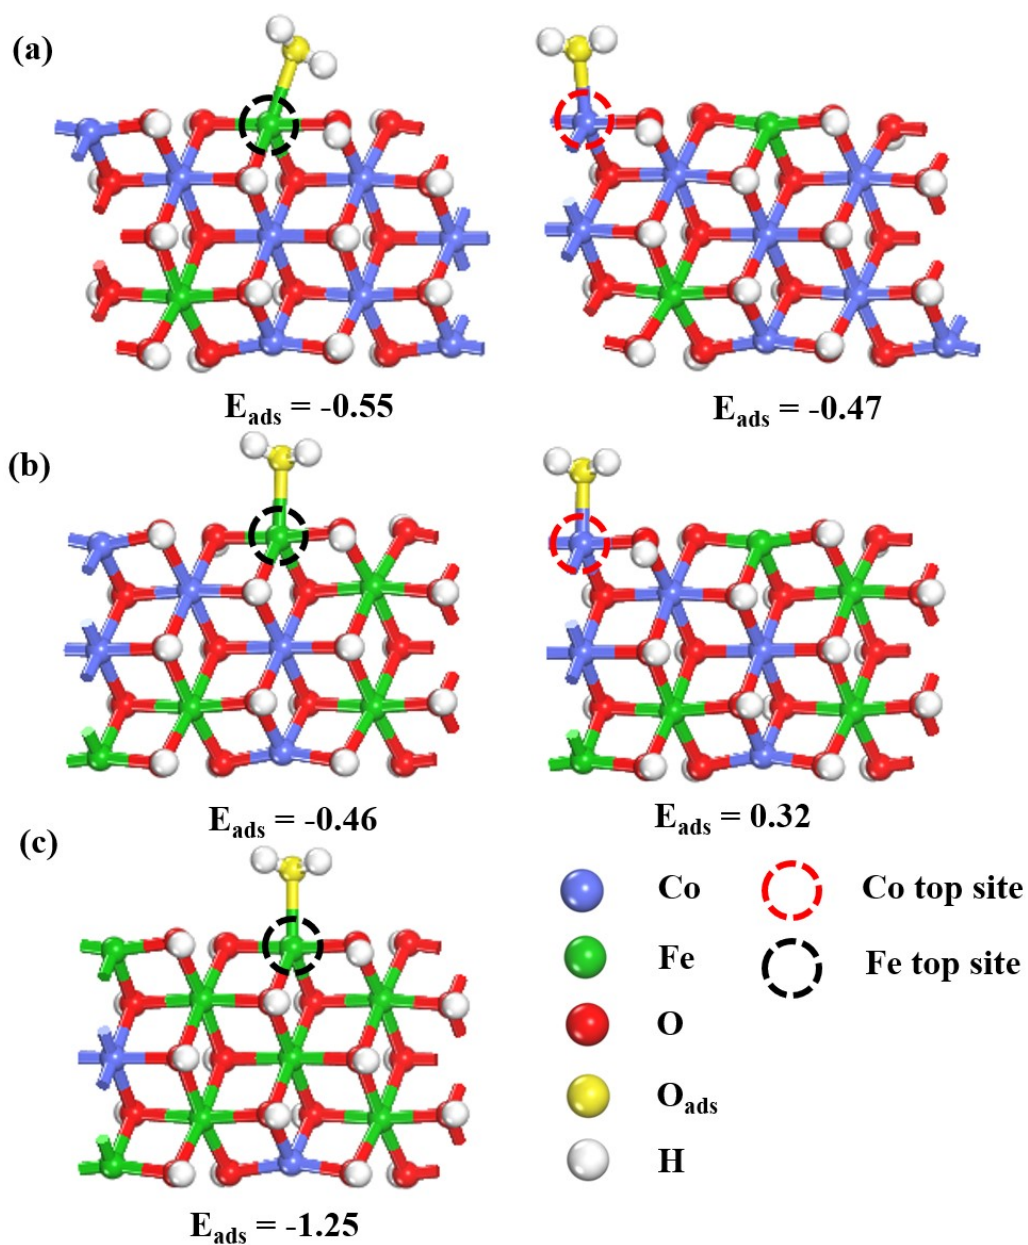

**Figure S20.**  $\text{H}_2\text{O}$  adsorption with different metal elements as active sites in CoFe hydroxide model on (a) 4:1, (b) 1:1, and (c) 4:1. In CoFe hydroxide, we calculated the  $\text{H}_2\text{O}$  adsorption of three samples with different metals as active sites, and the results shown that in CoFe hydroxide all Fe sites are favorable for  $\text{H}_2\text{O}$  adsorption, so Fe is selected as the active site.

**Table S1.**  $\text{Co}_x\text{Fe}_y(\text{OH})\text{F}$  with different value of x and y load before and after mass (1\*2 cm NF).

| <i>Sample name</i> | <i>Before the load</i><br><i>(g)</i> | <i>After the load</i><br><i>(g)</i> | <i>Charge number</i><br><i>(g)</i> |
|--------------------|--------------------------------------|-------------------------------------|------------------------------------|
| <i>X = 0.41</i>    | 0.0648                               | 0.0808                              | 0.0160                             |
| <i>X = 0.21</i>    | 0.0640                               | 0.0802                              | 0.0162                             |
| <i>X = 0.14</i>    | 0.0698                               | 0.0864                              | 0.0166                             |

**Table S2.** ICP-MS of  $\text{Co}_x\text{Fe}_y(\text{OH})\text{F}$  with different value of x and y.

| Instrument model      | ICP-MS:Aglient 7800          |                                          |              |                                                  |                     |                                                                           |                                      |                              |                                          |                                  |                                                   |
|-----------------------|------------------------------|------------------------------------------|--------------|--------------------------------------------------|---------------------|---------------------------------------------------------------------------|--------------------------------------|------------------------------|------------------------------------------|----------------------------------|---------------------------------------------------|
| Instrument parameters | Pump Rate                    | 29r/min                                  |              |                                                  |                     |                                                                           |                                      |                              |                                          |                                  |                                                   |
|                       | Nebulizer Flow               | 0.86L/min                                |              |                                                  |                     |                                                                           |                                      |                              |                                          |                                  |                                                   |
|                       | Auxiliary Gas                | 0.7L/min                                 |              |                                                  |                     |                                                                           |                                      |                              |                                          |                                  |                                                   |
|                       | Sample Flush Time            | 40s                                      |              |                                                  |                     |                                                                           |                                      |                              |                                          |                                  |                                                   |
|                       | RF Power                     | 1300w                                    |              |                                                  |                     |                                                                           |                                      |                              |                                          |                                  |                                                   |
| Molar ratio of input  | The sample quality $m_0$ (g) | The volume of constant volume $V_0$ (mL) | Test element | Test solution element concentration $C_0$ (mg/L) | Diluted multiples f | The elemental concentration of the sample digestion solution $C_1$ (mg/L) | Sample element content $C_x$ (mg/kg) | Sample element content W (%) | Average element content of samples W (%) | Element content ratio of samples | Total average content of Fe and Co in samples (%) |
| X = 0.41              | 0.0453                       | 25                                       | Co           | 0.073                                            | 10000               | 730                                                                       | 402869.8                             | 40.29%                       | 40.84%                                   | 2.88                             | 54.99%                                            |
|                       | 0.0453                       | 25                                       | Co           | 0.075                                            | 10000               | 750                                                                       | 413907.3                             | 41.39%                       |                                          |                                  |                                                   |
|                       | 0.0453                       | 25                                       | Fe           | 0.255                                            | 1000                | 255                                                                       | 140728.5                             | 14.07%                       |                                          |                                  |                                                   |
| X = 0.21              | 0.0453                       | 25                                       | Fe           | 0.258                                            | 1000                | 258                                                                       | 142384.1                             | 14.24%                       | 14.16%                                   | 0.77                             | 49.06%                                            |
|                       | 0.0358                       | 25                                       | Co           | 0.305                                            | 1000                | 305                                                                       | 212988.8                             | 21.30%                       |                                          |                                  |                                                   |
|                       | 0.0358                       | 25                                       | Co           | 0.306                                            | 1000                | 306                                                                       | 213687.2                             | 21.37%                       |                                          |                                  |                                                   |
|                       | 0.0358                       | 25                                       | Fe           | 0.395                                            | 1000                | 395                                                                       | 275838.0                             | 27.58%                       |                                          |                                  |                                                   |
| X = 0.14              | 0.0358                       | 25                                       | Fe           | 0.399                                            | 1000                | 399                                                                       | 278631.3                             | 27.86%                       | 27.72%                                   | 0.19                             | 84.63%                                            |
|                       | 0.0314                       | 25                                       | Co           | 0.174                                            | 1000                | 174                                                                       | 138535.0                             | 13.85%                       |                                          |                                  |                                                   |
|                       | 0.0314                       | 25                                       | Co           | 0.172                                            | 1000                | 172                                                                       | 136942.7                             | 13.69%                       |                                          |                                  |                                                   |
|                       | 0.0314                       | 25                                       | Fe           | 0.088                                            | 10000               | 880                                                                       | 700636.9                             | 70.06%                       |                                          |                                  |                                                   |
|                       | 0.0314                       | 25                                       | Fe           | 0.090                                            | 10000               | 900                                                                       | 716560.5                             | 71.66%                       |                                          |                                  |                                                   |

$$Cx(\text{mg} / \text{kg}) = \frac{C_0(\text{mg} / \text{L}) * f * V_0 * 10^{-3}}{m(\text{g}) * 10^{-3}} = \frac{C_1(\text{mg} / \text{L}) * V_0(\text{mL}) * 10^{-3}}{m(\text{g}) * 10^{-3}} \quad (4)$$

$$W(\%) = \frac{Cx(\text{mg} / \text{kg})}{10^6} * 100\% \quad (5)$$

$M_0$ : The mass of the sample taken, g, is recorded by the analytical balance;

$V_0$ : After sample digestion, the volume of constant volume, mL;

f: Diluted multiples;

$C_0$ : Measurement of the concentration of elements in a solution, mg/L;

$C_1$ : The elemental concentration of the sample digestion solution, mg/L,  $C_1(\text{mg/L}) =$

$C_0(\text{mg/L}) * f$ ;

Cx: The final test result of the element under test, mg/kg.

Calculated by the above formula (4); W(%): the final test result of the test element is expressed in the form of percentage and calculated by the above formula (5).

**Table S3.** ICP-MS and XPS analysis of with different value of x and y.

| Molar ratio of input | The sample quality(g) | ICP-MS                  |        | XPS                  |                  |
|----------------------|-----------------------|-------------------------|--------|----------------------|------------------|
|                      |                       | Average element content |        | Area ratio of sample |                  |
|                      |                       | Co                      | Fe     | Co <sup>2+</sup>     | Co <sup>3+</sup> |
| X = 0.41             | 0.0453                | 40.84%                  | 14.16% | 21.50%               | 14.89%           |
| X = 0.21             | 0.0358                | 21.33%                  | 27.72% | 38.99%               | 14.47%           |
| X = 0.14             | 0.0314                | 13.77%                  | 70.96% | 34.29%               | 14.91%           |

**Table S4.** Comparison of OER catalytic activity in 1 M KOH electrolyte between  $\text{Co}_{0.21}\text{Fe}_{0.28}(\text{OH})\text{F}/\text{NF}$  and recently reported self-supported oxyhydroxide, layered double hydroxide and other catalysts.

| Catalyst                                                        | $\eta_{10}^*$ (mV)    | $\eta_{100}^*$ (mV) | Reference                                     |
|-----------------------------------------------------------------|-----------------------|---------------------|-----------------------------------------------|
| $\text{Co}_{0.21}\text{Fe}_{0.28}(\text{OH})\text{F}/\text{NF}$ | 195                   | 341                 | This work                                     |
| NiFeCr LDH/CP                                                   | 225 ( $\eta_{25}^*$ ) | N/A                 | Adv. Energy Mater. 2018, 8, 1703189.          |
| FeOOH/Ni <sub>3</sub> N/CC                                      | 244                   | ~320                | Appl. Catal. B. 2020, 269, 118600.            |
| NiFeO <sub>x</sub> (OH) <sub>y</sub> @MoS <sub>2</sub> /rGO     | 250 ( $\eta_{20}^*$ ) | N/A                 | Chem. Eng. J. 2020, 397, 125454.              |
| FeNiOOH/FNF                                                     | 252                   | ~290                | Chem. Eng. J. 2020, 395, 125180.              |
| NCS/NS-rGO                                                      | 253                   | ~370                | Nano Res. 2022, 15, 950-958.                  |
| CoOOH/Cu/NF                                                     | 260                   | ~357                | ACS Sustain. Chem. Eng. 2021, 9, 12300-12310. |
| $\delta$ -FeOOH NSs/NF                                          | 265                   | ~370                | Adv. Mater. 2018, 30, 1803144.                |
| Ni <sub>x</sub> B/f-MWCNT                                       | 286                   | N/A                 | J. Mater. Chem. A 2019, 7, 764-774.           |
| NF/H-CoMoO <sub>4</sub>                                         | 295                   | ~343                | J. Catal. 2020, 381, 44-52.                   |
| Fe-NiO/NF                                                       | 305                   | ~390                | Nano Energy 2019, 66, 104118.                 |
| Pc-Ni-B@NB                                                      | 302                   | N/A                 | Angew. Chem. Int. Ed. 2017, 56, 6572          |
| Co-Ni <sub>3</sub> N/CC                                         | 307                   | N/A                 | Adv. Mater. 2018, 30, e1705516.               |
| Co-Ni-B@NF                                                      | 313                   | 1.02(V)             | J. Mater. Chem. A, 2017, 5, 12379.            |

\* $\eta_{10}$ ,  $\eta_{20}$ ,  $\eta_{25}$  and  $\eta_{100}$  represent the overpotentials required to attain current densities of 10, 20, 25, and 100 mA cm<sup>-2</sup>, respectively. NF: nickel foam; CC: carbon cloth; CP: carbon paper; CF: carbon fiber; FNF: FeNi foam; rGO: reduced graphene oxide; CNTs: carbon nanotubes.
